# Supplementary material for: Prognostic value of plasma big endothelin-1 in left ventricular non-compaction cardiomyopathy
Source: HighWire-hosted journal article supplement (doi:10.1136/heartjnl-2020-317059), 2020-10-14
Supplement: heartjnl-2020-317059supp004_data_supplement.pdf [file heartjnl-2020-317059supp004_data_supplement.pdf]

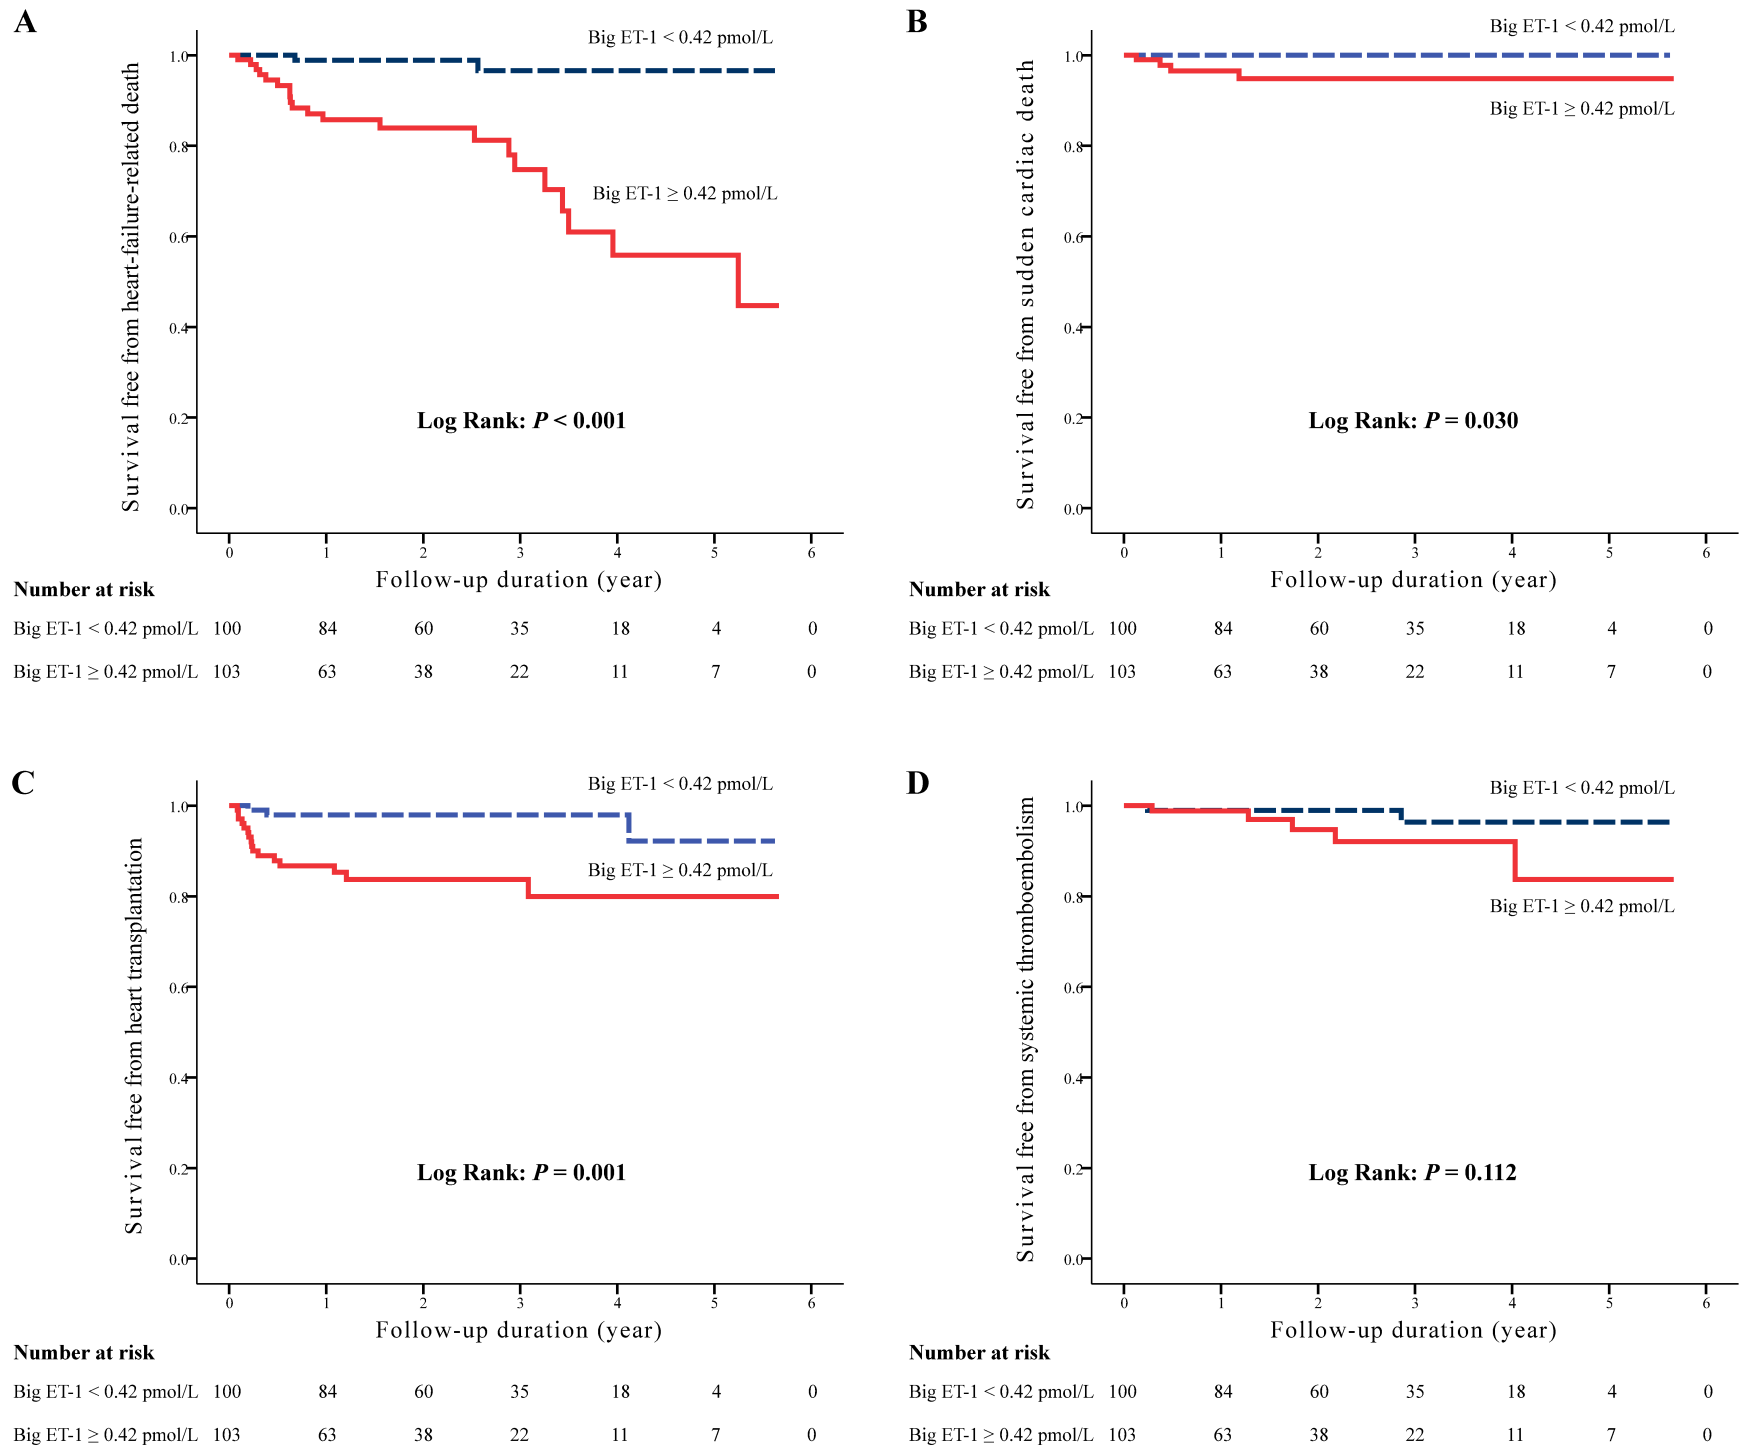

**Supplemental Figure 3.** Kaplan-Meier curves of survival free from heart failure-related death (A), sudden cardiac death (B), heart transplantation (C), and systemic embolism (D). The  $P$ -values were calculated by the Log-rank test.
